# Supplementary material for: The importance of unsealed areas in the urban core and periphery for bird diversity in a large central european city
Source: Springer Nature journal article supplement (doi:10.1007/s11252-023-01361-9), 2023-04-19
Supplement: MOESM1 [file 25261628]

Appendix 1

| **Common Name** | **Scientific Name** | **Conservation Status Germany (2015)** | **Conservation Status Hamburg (2018)** | **Occupancy (total)** | **Occupancy (%)** |
| --- | --- | --- | --- | --- | --- |
| Barn Swallow | *Hirundo rustica* | V | * | 100 | 13.14 |
| Black Redstart | *Phoenicurus ochruros* | * | * | 37 | 4.86 |
| Black Woodpecker | *Dryocopus martius* | * | * | 8 | 1.05 |
| Black-headed Gull | *Chroicocephalus ridibundus* | * | 2 | 2 | 0.26 |
| Bluethroat | *Luscinia svecica* | * | * | 2 | 0.26 |
| Canada Goose | *Branta canadensis* |  |  | 14 | 1.84 |
| Carrion Crow | *Corvus corone* | * | * | 391 | 51.38 |
| Carrion x Hooded Crow | *Corvus corone x cornix* |  |  | 6 | 0.79 |
| Coal Tit | *Periparus ater* | * | * | 11 | 1.45 |
| Common Blackbird | *Turdus merula* | * | * | 408 | 53.61 |
| Common Buzzard | *Buteo buteo* | * | * | 44 | 5.78 |
| Common Chaffinch | *Fringilla coelebs* | * | * | 242 | 31.80 |
| Common Chiffchaff | *Phylloscopus collybita* | * | * | 412 | 54.14 |
| Common Crane | *Grus grus* | * | * | 6 | 0.79 |
| Common Cuckoo | *Cuculus canorus* | 3 | V | 18 | 2.37 |
| Common Firecrest | *Regulus ignicapilla* | * | * | 10 | 1.31 |
| Common Goldeneye | *Bucephala clangula* | * | * | 1 | 0.13 |
| Common Gull | *Larus canus* | * | * | 226 | 29.70 |
| Common Grasshopper Warbler | *Locustella naevia* | 2 | * | 3 | 0.39 |
| Common House Martin | *Delichon urbicum* | 3 | * | 49 | 6.44 |
| Common Kestrel | *Falco tinnunculus* | * | 2 | 22 | 2.89 |
| Common Linnet | *Linaria cannabina* | 3 | 3 | 3 | 0.39 |
| Common Moorhen | *Gallinula chloropus* | V | * | 7 | 0.92 |
| Common Nightingale | *Luscinia megarhynchos* | * | V | 19 | 2.50 |
| Common Pheasant | *Phasianus colchicus* |  |  | 44 | 5.78 |
| Common Quail | *Coturnix coturnix* | V | 3 | 1 | 0.13 |
| Common Redstart | *Phoenicurus phoenicurus* | * | * | 14 | 1.84 |
| Common Reed Bunting | *Emberiza schoeniclus* | * | * | 15 | 1.97 |
| Common Sandpiper | *Actitis hypoleucos* | 2 | 0 | 1 | 0.13 |
| **Common Name** | ***Scientific Name*** | **Conservation Status Germany (2015)** | **Conservation Status Hamburg (2018)** | **Occupancy (total)** | **Occupancy (%)** |
| Common Shelduck | *Tadorna tadorna* | * | * | 27 | 3.55 |
| Common Starling | *Sturnus vulgaris* | 3 | 3 | 245 | 32.19 |
| Common Swift | *Apus apus* | * | * | 99 | 13.01 |
| Common Whitethroat | *Curruca communis* | * | * | 59 | 7.75 |
| Common Wood Pigeon | *Columba palumbus* | * | * | 543 | 71.35 |
| Dunnock | *Prunella modularis* | * | * | 69 | 9.07 |
| Egyptian Goose | *Alopochen aegyptiaca* |  |  | 2 | 0.26 |
| Eurasian Blackcap | *Sylvia atricapilla* | * | * | 269 | 35.35 |
| Eurasian Blue Tit | *Cyanistes caeruleus* | * | * | 404 | 53.09 |
| Eurasian Bullfinch | *Pyrrhula pyrrhula* | * | * | 89 | 11.70 |
| Eurasian Collared Dove | *Streptopelia decaocto* | * | * | 19 | 2.50 |
| Eurasian Coot | *Fulica atra* | * | * | 27 | 3.55 |
| Eurasian Jay | *Garrulus glandarius* | * | * | 80 | 10.51 |
| Eurasian Magpie | *Pica pica* | * | * | 175 | 23.00 |
| Eurasian Nuthatch | *Sitta europaea* | * | * | 50 | 6.57 |
| Eurasian Oystercatcher | *Haematopus ostralegus* | * | * | 14 | 1.84 |
| Eurasian Reed Warbler | *Acrocephalus scirpaceus* | * | * | 28 | 3.68 |
| Eurasian Skylark | *Alauda arvensis* | 3 | 2 | 17 | 2.23 |
| Eurasian Sparrowhawk | *Accipiter nisus* | * | * | 5 | 0.66 |
| Eurasian Tree Sparrow | *Passer montanus* | V | * | 30 | 3.94 |
| Eurasian Treecreeper | *Certhia familiaris* | * | * | 7 | 0.92 |
| Eurasian Wren | *Troglodytes troglodytes* | * | * | 271 | 35.61 |
| European Crested Tit | *Lophophanes cristatus* | * | * | 4 | 0.53 |
| European Goldfinch | *Carduelis carduelis* | * | * | 47 | 6.18 |
| European Green Woodpecker | *Picus viridis* | * | * | 17 | 2.23 |
| European Greenfinch | *Chloris chloris* | * | * | 84 | 11.04 |
| European Herring Gull | *Larus argentatus* | V | * | 32 | 4.20 |
| European Pied Flycatcher | *Ficedula hypoleuca* | 3 | 2 | 6 | 0.79 |
| European Robin | *Erithacus rubecula* | * | * | 213 | 27.99 |
| European Serin | *Serinus serinus* | * | * | 3 | 0.39 |
| European Stonechat | *Saxicola rubicola* | * | * | 9 | 1.18 |
| **Common Name** | ***Scientific Name*** | **Conservation Status Germany (2015)** | **Conservation Status Hamburg (2018)** | **Occupancy (total)** | **Occupancy (%)** |
| Feral Pigeon | *Columba livia* |  |  | 130 | 17.08 |
| Fieldfare | *Turdus pilaris* | * |  | 1 | 0.13 |
| Gadwall | *Mareca strepera* | * | * | 2 | 0.26 |
| Garden Warbler | *Sylvia borin* | * | V | 6 | 0.79 |
| Garganey | *Spatula querquedula* | 1 | 1 | 1 | 0.13 |
| Goldcrest | *Regulus regulus* | * | * | 21 | 2.76 |
| Great Cormorant | *Phalacrocorax carbo* | * | * | 34 | 4.47 |
| Great Crested Grebe | *Podiceps cristatus* | * | * | 10 | 1.31 |
| Great Reed Warbler | *Acrocephalus arundinaceus* | * | 2 | 1 | 0.13 |
| Great Spotted Woodpecker | *Dendrocopos major* | * | * | 130 | 17.08 |
| Great Tit | *Parus major* | * | * | 445 | 58.48 |
| Grey Heron | *Ardea cinerea* | * | * | 28 | 3.68 |
| Greylag Goose | *Anser anser* | * | * | 60 | 7.88 |
| Greylag x Canada Goose | *Anser anser x Branta canadensis* |  |  | 1 | 0.13 |
| Hawfinch | *Coccothraustes coccothraustes* | * | * | 6 | 0.79 |
| House Sparrow | *Passer domesticus* | * | 3 | 155 | 20.37 |
| Icterine Warbler | *Hippolais icterina* | * | V | 12 | 1.58 |
| Lesser Black-backed Gull | *Larus fuscus* | * | * | 4 | 0.53 |
| Lesser Spotted Woodpecker | *Dryobates minor* | 3 | 3 | 1 | 0.13 |
| Lesser Whitethroat | *Curruca curruca* | * | * | 40 | 5.26 |
| Little Grebe | *Tachybaptus ruficollis* | * | * | 2 | 0.26 |
| Little Ringed Plover | *Charadrius dubius* | V | 3 | 2 | 0.26 |
| Long-tailed Tit | *Aegithalos caudatus* | * | * | 18 | 2.37 |
| Mallard | *Anas platyrhynchos* | * | * | 110 | 14.45 |
| Mallard x domestic duck | *Anas platyrhynchos* |  |  | 7 | 0.92 |
| Marsh Tit | *Poecile palustris* | * | * | 6 | 0.79 |
| Marsh Warbler | *Acrocephalus palustris* | * | * | 24 | 3.15 |
| Meadow Pipit | *Anthus pratensis* | 2 | 2 | 7 | 0.92 |
| Mediterranean Gull | *Ichthyaetus melanocephalus* | * | * | 1 | 0.13 |
| Mistle Thrush | *Turdus viscivorus* | * | * | 3 | 0.39 |
| Mute Swan | *Cygnus olor* | * | * | 16 | 2.10 |
| **Common Name** | ***Scientific Name*** | **Conservation Status Germany (2015)** | **Conservation Status Hamburg (2018)** | **Occupancy (total)** | **Occupancy (%)** |
| Northern Goshawk | *Accipiter gentilis* | * | * | 1 | 0.13 |
| Northern Lapwing | *Vanellus vanellus* | 2 | 2 | 7 | 0.92 |
| Northern Raven | *Corvus corax* | * | * | 10 | 1.31 |
| Red Kite | *Milvus milvus* | * | 1 | 3 | 0.39 |
| Red-backed Shrike | *Lanius collurio* | * | * | 7 | 0.92 |
| Redwing | *Turdus iliacus* |  |  | 1 | 0.13 |
| Ring Ouzel | *Turdus torquatus* | * |  | 1 | 0.13 |
| Rook | *Corvus frugilegus* | * | V | 1 | 0.13 |
| Sand Martin | *Riparia riparia* | * | 1 | 2 | 0.26 |
| Savi's Warbler | *Locustella luscinioides* | * | * | 1 | 0.13 |
| Sedge Warbler | *Acrocephalus schoenobaenus* | * | * | 2 | 0.26 |
| Short-toed Treecreeper | *Certhia brachydactyla* | * | * | 73 | 9.59 |
| Song Thrush | *Turdus philomelos* | * | * | 88 | 11.56 |
| Spotted Flycatcher | *Muscicapa striata* | V | V | 12 | 1.58 |
| Stock Dove | *Columba oenas* | * | * | 2 | 0.26 |
| Tree Pipit | *Anthus trivialis* | V | V | 9 | 1.18 |
| Tufted Duck | *Aythya fuligula* | * | * | 11 | 1.45 |
| Western Jackdaw | *Coloeus monedula* | * | * | 23 | 3.02 |
| Western Marsh Harrier | *Circus aeruginosus* | * | 3 | 1 | 0.13 |
| Western Yellow Wagtail | *Motacilla flava* | * | * | 5 | 0.66 |
| Whinchat | *Saxicola rubetra* | 2 | 1 | 1 | 0.13 |
| White Stork | *Ciconia ciconia* | V | V | 13 | 1.71 |
| White Wagtail | *Motacilla alba* | * | * | 56 | 7.36 |
| White-tailed Eagle | *Haliaeetus albicilla* | * | * | 1 | 0.13 |
| Willow Tit | *Poecile montanus* | * | * | 3 | 0.39 |
| Willow Warbler | *Phylloscopus trochilus* | * | 3 | 16 | 2.10 |
| Wood Warbler | *Phylloscopus sibilatrix* | * | * | 16 | 2.10 |
| Yellowhammer | *Emberiza citrinella* | * | * | 41 | 5.39 |
